# Supplementary material for: Genomic Profiling of Multidrug-Resistant Swine Escherichia coli and Clonal Relationship to Human Isolates in Peru
Source: MDPI journal article supplement (doi:10.3390/antibiotics12121748), 2023-12-18
Supplement: s1 [file s1]

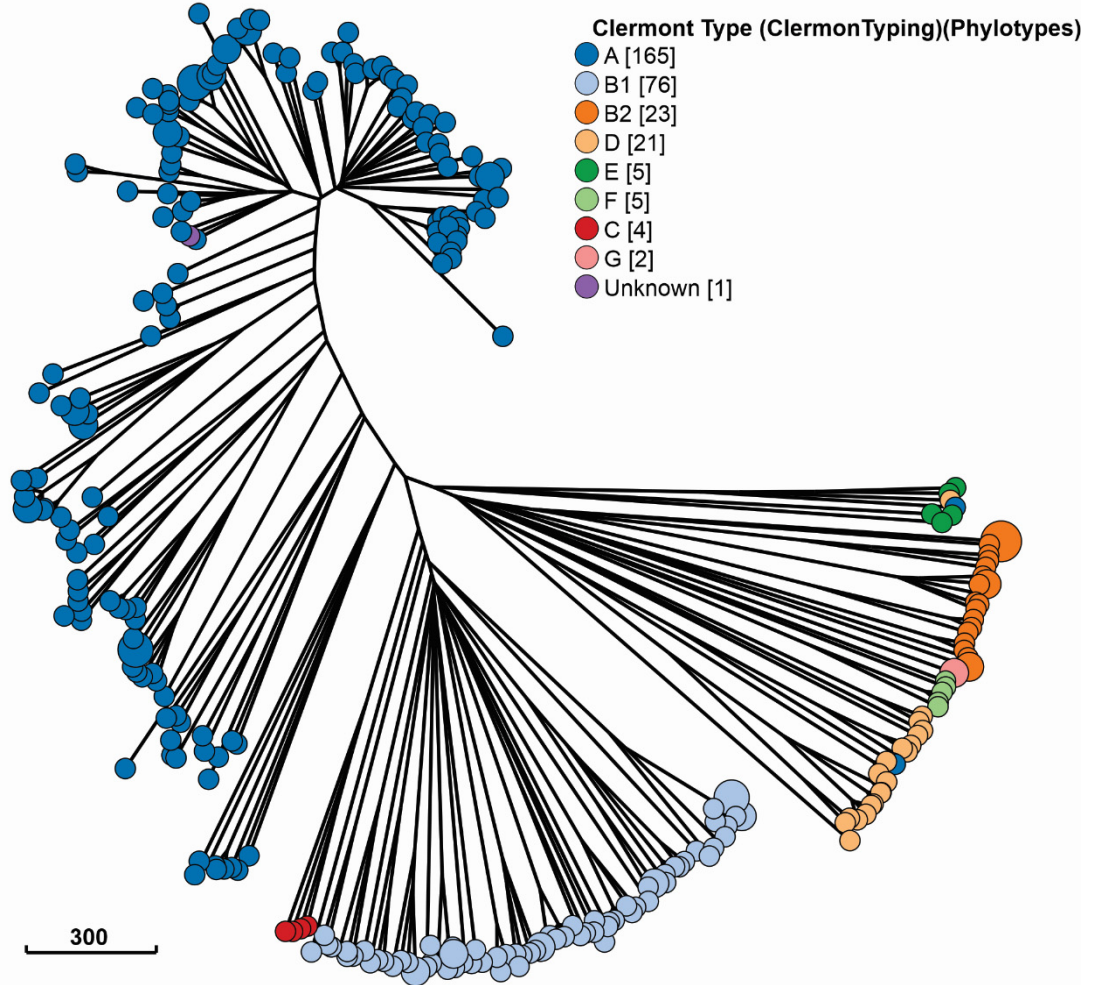

Figure S2. GrapeTree inferred using the Neighbor-joining (RapidNJ) algorithm based on the cgMLST V1 + Hierarchical Clustering (HierCC) V1 scheme of 302 Peruvian genomes according to the Clermont type. The numbers in brackets are the number of isolates belonging to a Clermont type.
