# Supplementary material for: Genomic Profiling of Multidrug-Resistant Swine Escherichia coli and Clonal Relationship to Human Isolates in Peru
Source: Antibiotics (Basel). 2023 Dec 18;12(12):1748. doi: 10.3390/antibiotics12121748 (PMC10740509; doi:10.3390/antibiotics12121748)
Supplement: Supplementary file 1 [file antibiotics-12-01748-s001.zip › Supplementary tables.xlsx]

## Sheet: Supplementary Table S1
Supplementary Table S1. Summary of characterization of 10 E. coli isolates from swine (Sequencetype, serotype, phylogroup and ARGs)
STRAIN	ST	Serotype	Phylogroup	ARGs
EC 204K	ST 100	O149 H10	A	tet(A), blaTEM-1B, floR, ant(3'')-Ia, sul3, qnrB19, dfrA1, mdf(A), mcr-1.1
EC 206K	ST10	O16 H48	A	tet(A), Tet (B), BlaTEM-1A, floR, sul3, qnrB19, lnu(G), mdf(A)
EC 225K	ST 1602	H38	A	tet(A), tet(M), blaTEM-1B, cmlA1, aac(3)-IId, ant(3'')-Ia, aph(3')-Ia, sul3, qnrB19, lnu(F), dfrA12, mdf(A)
EC 237K	ST10	H19 O36	A	tet(C), qnrB19, blaTEM-176, aph(6)-Id, aph(3'')-Ib, Sul2, dfrA8, mdf(A), floR, tet(A), aph(3')-Ia
EC 247K	ST 167	O101 H9	A	aph(3')-Ia, aph(6)-Id, aph(3'')-Ib, Sul2, mdf(A), Tet(A), blaCTX-M-14
EC 248K	ST10	H32	A	sul3, mdf(A), ant(3'')-Ia, floR, blaTEM-1A, qnrB19, tet(B), lnu(G)
EC 254K	ST10	O6 H27	A	cmlA1,blaTEM-1B, qnrB19, sul3, dfrA12, tet(M), tet(B), aph(3'')-Ib, aph(6)-Id, mdf(A), ant(3'')-Ia
EC 258K	ST3345	O8 H20	A	CmlA1, floR, blaTEM-1B, qnrS1, qnrB19, sul3, dfrA14, tet(B), tet(A), mef(B), ant(3'')-Ia, aadA2b, mdf(A)
EC 273K	ST29	O186 H11	B1	FloR, qnrB19, sul3, dfrA1, tet(A), ant(3'')-Ia, mdf(A)
EC 275K	ST29	O186 H11	B1	floR, qnrB19, sul3, dfrA1, tet(A), ant(3'')-Ia, mdf(A)

## Sheet: Supplementary Table S2
Supplementary Table S2. Virulence genes of ten E. coli isolates from swine
		ExPEC																	ETEC			EPEC
		Adhesins				Iron uptake					Protectins/serum resistance						Toxins		Enterotoxins		Adhesins
Isolate	ST	pap	iha	hra	Fim	fyuA	iucC	irp2	iutA	sitA	ompA	ompT	iss	traT	neuC	astA		hlyA	lt	stb	K88/F4	eae	LEE	nLEE	T3SS
EC 204K	ST 100	-	+	-	-	-	-	-	-	-	+	-	-	+	-	+		+	+	+	+	-	-	-	-
EC 206K	ST10	-	-	-	+	-	-	-	-	-	+	-	+	-	-	-		-	-	-	-	-	-	-	-
EC 225K	ST 1602	-	-	-	+	-	-	-	-	-	+	-	-	+	-	+		-	-	-	-	-	-	-	-
EC 237K	ST10	-	-	-	+	-	-	-	-	-	+	-	+	-	-	+		-	-	-	-	-	-	-	-
EC 247K	ST 167	+	-	-	-	+	+	+	+	+	+	-	+	+	-	-		-	-	-	-	-	-	-	-
EC 248K	ST10	-	-	-	+	-	-	-	-	-	+	-	-	-	-	-		-	-	-	-	-	-	-	-
EC 254K	ST10	-	-	-	+	-	-	-	-	-	+	-	-	-	-	-		-	-	-	-	-	-	-	-
EC 258K	ST3345	-	-	+	-	-	-	-	-	-	+	-	-	+	+	-		-	-	-	-	-	-	-	-
EC 273K	ST29	-	+	-	+	-	+	-	+	-	+	+	+	+	-	+		-	-	-	-	+	+	+	+
EC 275K	ST29	+	+	+	+	-	+	-	+	-	+	+	+	+	-	+		-	-	-	-	+	+	+	+
LEE: locus for enterocyte effacement (LEE) translocator (espA, espB, espD, tir)
T3SS: type III secretion system (esc)
nLEE: non-LEE effector (nleA, nleB, nleE)

## Sheet: Supplementary Table S3
Supplementary Table S3. Results of antibiotic sensitivity test
	Antibiotics
	Furazolidone		Tetracycline		Enrofloxacin		Ceftiofur		Fosfomycin		Sulfonamide		Ceftazidime		Penicillin
Strain	Inhibition zone diameter (mm)	Interpretation	Inhibition zone diameter (mm)	Interpretation	Inhibition zone diameter (mm)	Interpretation	Inhibition zone diameter (mm)	Interpretation	Inhibition zone diameter (mm)	Interpretation	Inhibition zone diameter (mm)	Interpretation	Inhibition zone diameter (mm)	Interpretation	Inhibition zone diameter (mm)	Interpretation
EC 204 K	30	S	12	R	10	R	36	S	30	S	8	R	28	S	10	R
EC 206 K	30	S	12	R	8	R	36	S	30	S	10	R	30	S	10	R
EC 225 K	28	S	10	R	12	R	30	S	36	S	8	R	36	S	8	R
EC 237 K	32	S	12	R	12	R	32	S	28	S	8	R	28	S	8	R
EC 247K	30	S	8	R	8	R	28	S	30	S	8	R	30	S	8	R
EC 248 K	26	S	10	R	12	R	30	S	28	S	12	R	32	S	12	R
EC 254K	28	S	26	S	24	S	30	S	28	S	12	R	32	S	10	R
EC 258 K	30	S	12	R	12	R	36	S	30	S	8	R	36	S	8	R
EC 273 K	32	S	10	R	8	R	32	S	36	S	10	R	30	S	8	R
EC 275 K	32	S	12	R	8	R	36	S	30	S	12	R	30	S	10	R
S: sensitive
R: Resistant

## Sheet: Supplementary Table S4
Supplementary Table S3. The SNP matrix consisted of 7473 SNP positions between swine ETEC and Human isolates.
	EC204K	P274-E173	P092-E082	P139-E101	P124-E095	P117-E092	P038-E032	P180-E121	P192-E124
EC204K	0	7231	3481	3472	3474	7306	7149	7205	7300
P274-E173	7231	0	6790	6781	6779	1275	1080	1220	7444
P092-E082	3481	6790	0	13	19	6848	6670	6756	6829
P139-E101	3472	6781	13	0	8	6841	6663	6749	6818
P124-E095	3474	6779	19	8	0	6841	6663	6747	6818
P117-E092	7306	1275	6848	6841	6841	0	812	1036	7473
P038-E032	7149	1080	6670	6663	6663	812	0	809	7284
P180-E121	7205	1220	6756	6749	6747	1036	809	0	7379
P192-E124	7300	7444	6829	6818	6818	7473	7284	7379	0
min: 8 max: 7473

## Sheet: Supplementary Table S5
Supplementary Table S4. The SNP matrix consisted of 3991 SNP positions between swine EPEC and Human isolates.
	EC273K	EC275K	P038-E031	P038-E029	P038-E026	P299-E181	P322-E189	P218-E141	P204-E131	P004-E009	P079-E068	P159-E111	P159-E114
EC273K	0	33	2482	2474	2478	2489	2477	3991	2496	2481	2505	2462	2470
EC275K	33	0	2475	2467	2471	2482	2470	3984	2489	2474	2498	2455	2463
P038-E031	2482	2475	0	8	12	29	158	3361	24	9	39	148	148
P038-E029	2474	2467	8	0	4	21	160	3365	32	7	43	146	154
P038-E026	2478	2471	12	4	0	25	164	3369	36	11	41	150	158
P299-E181	2489	2482	29	21	25	0	175	3362	27	24	44	161	167
P322-E189	2477	2470	158	160	164	175	0	3358	172	159	197	29	29
P218-E141	3991	3984	3361	3365	3369	3362	3358	0	3359	3360	3370	3349	3343
P204-E131	2496	2489	24	32	36	27	172	3359	0	29	41	162	160
P004-E009	2481	2474	9	7	11	24	159	3360	29	0	44	151	149
P079-E068	2505	2498	39	43	41	44	197	3370	41	44	0	183	183
P159-E111	2462	2455	148	146	150	161	29	3349	162	151	183	0	10
P159-E114	2470	2463	148	154	158	167	29	3343	160	149	183	10	0
min: 4 max: 3991
